# Supplementary material
Source: publisher site journal article supplement (https://www.spandidos-publications.com/5208/downloadSupplementary)

Figure S1. Comparison of survival profiles among patients with esophageal cancer of different TRG grades. Comparison of (A) DFS and (B) OS rates between prolonged and short time interval groups of patients with TRG1. Comparison of (C) DFS and (D) OS rates between prolonged and short time interval groups of patients with TRG2. Comparison of (E) DFS and (F) OS rates between prolonged and short time interval groups of patients with TRG3. DFS, disease-free survival; OS, overall survival; TRG, tumor regression grade.

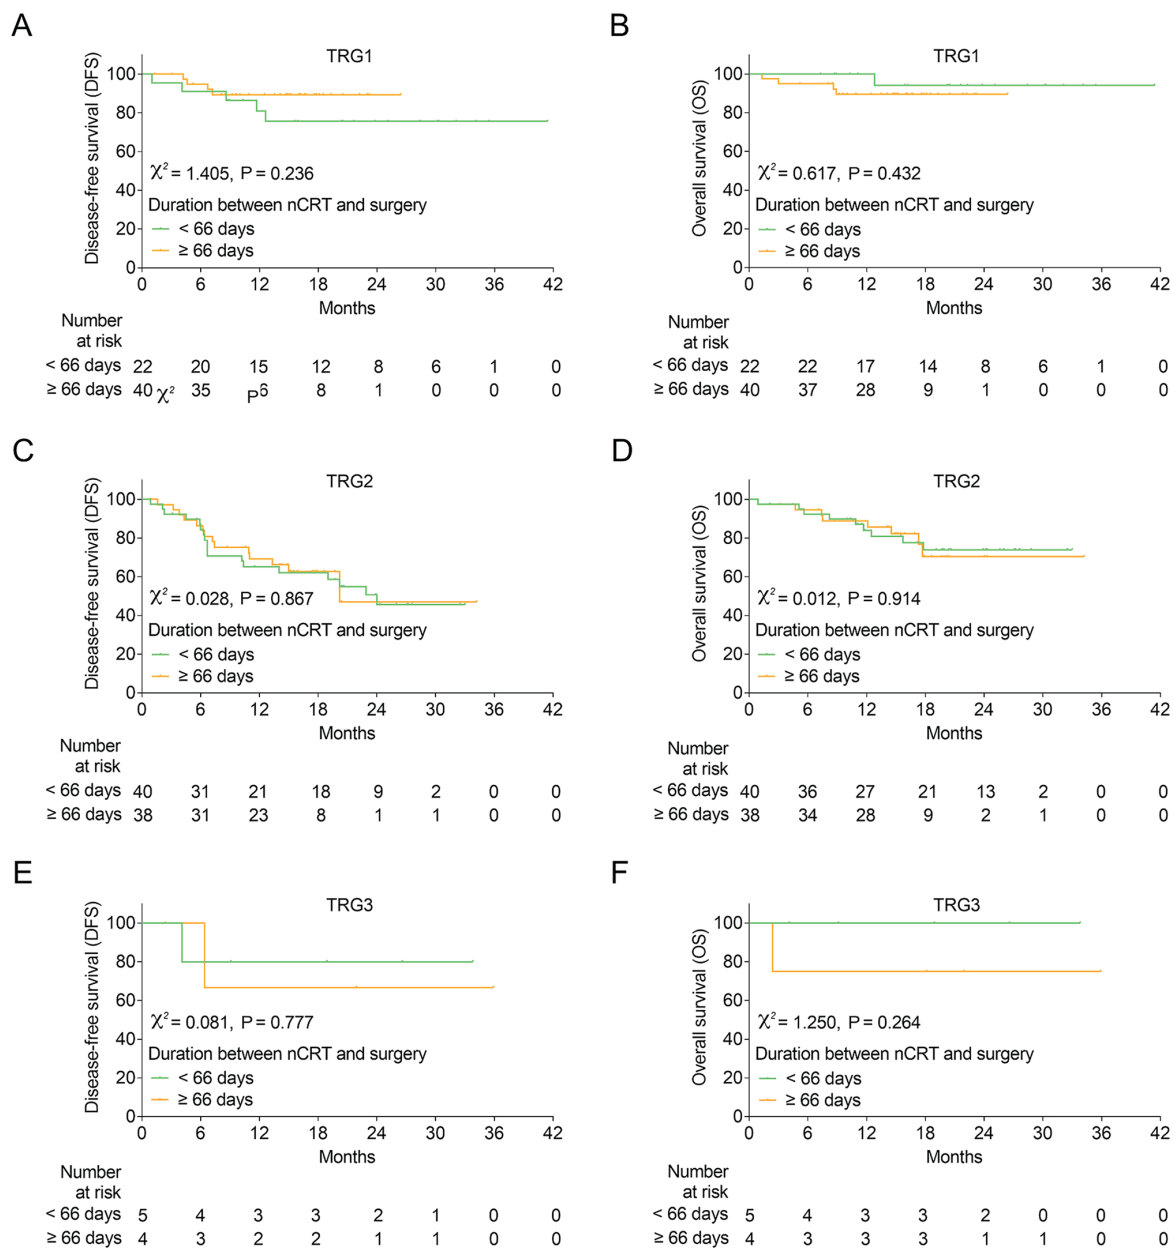

Supplement: Supplementary file 1 [file downloadSupplementary]
